# Supplementary material
Source: PubMed Central journal article supplement (PMC6275346)
Supplement: zam024188899s1.pdf [file zam024188899s1.pdf]

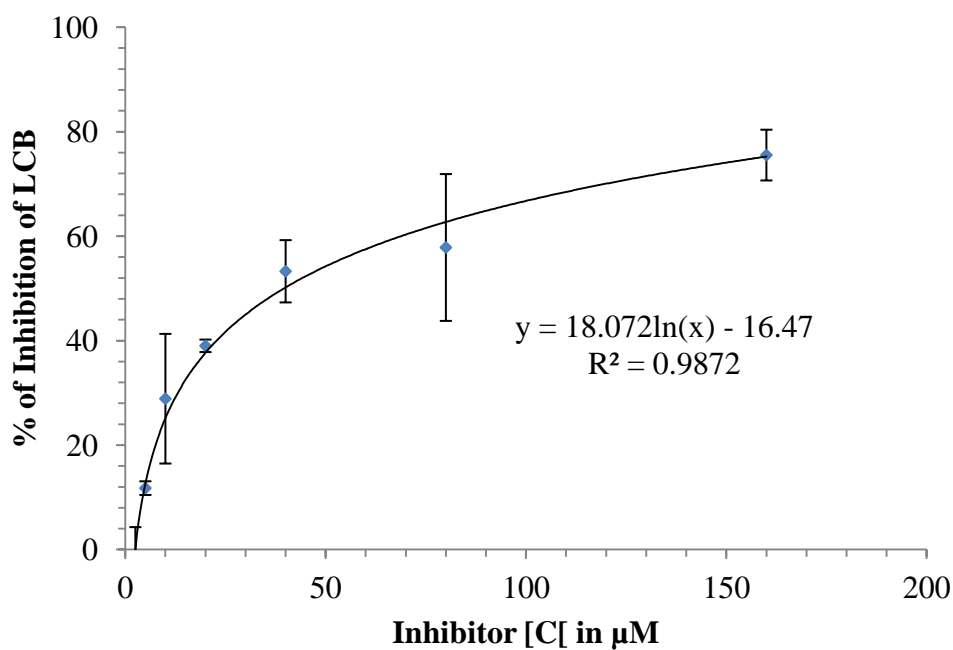

*Figure S1: Concentration-response curves to determine the inhibition of LCB by NPP using VAMPtide a peptide substrate for BoNT/B. Different concentrations of NPP were incubated with LCB and fluorescent peptide substrate. The % inhibition was determined by measuring fluorescence using an excitation wavelength of 320 nm and an emission wavelength of 418 nm. The symbols represent the mean  $\pm$  S.D. of data obtained from three replicate samples. The curve was fit by nonlinear regression analysis and yielded an  $IC_{50}$  of  $39.6 \pm 16.4 \mu\text{M}$ .*

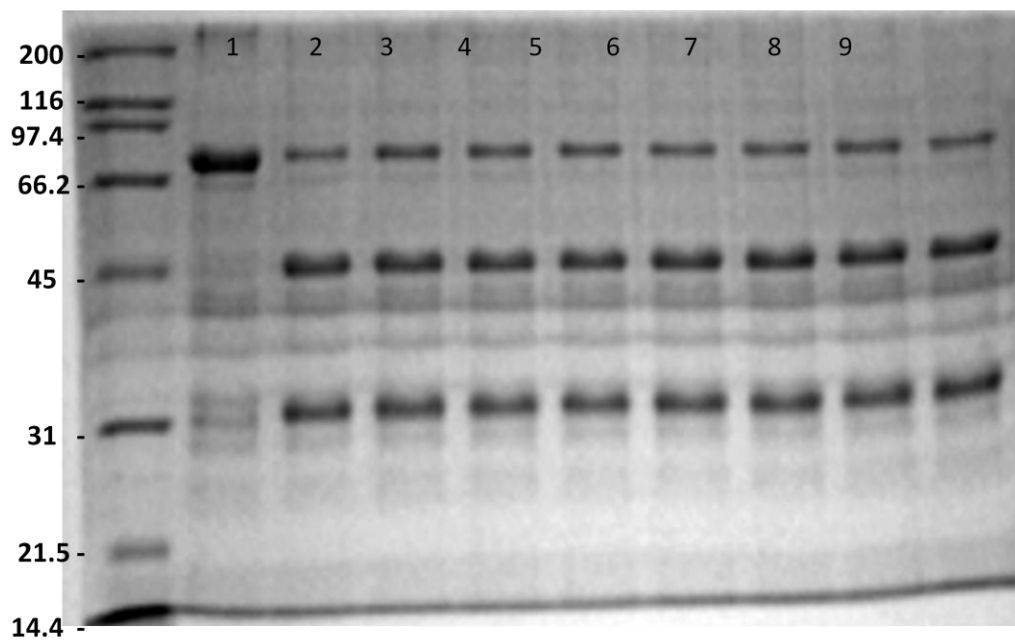

*Figure S2, Inhibition of the endopeptidase activity of LCE against SNAG substrate by NPP. Lane 1 is a marker lane, Lane 2 SNAG control lane, Lane 3 SNAG incubated with Light chain E in the absence of inhibitor as a positive control, Lane 4- 10 SNAG and LCE incubated in the presence of 2 fold serially diluted (80  $\mu$ M - 1.25  $\mu$ M) NPP inhibitor. The gel is representation of one of the three independent experiments.*
